# Supplementary material for: Inferring cancer type-specific patterns of metastatic spread
Source: PubMed Central journal article supplement (PMC11398359; doi:10.1101/2024.07.09.602790), 2024-09-03
Supplement: NIHPP2024.07.09.602790v2-supplement-1.pdf [file NIHPP2024.07.09.602790v2-supplement-1.pdf]

716 **Supplementary Figures and Tables**

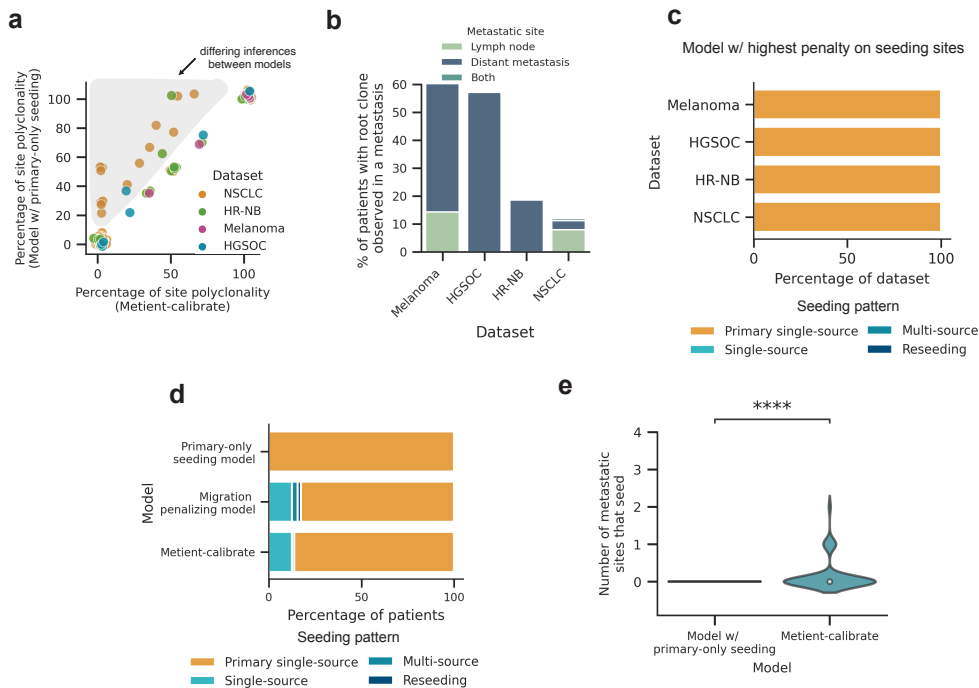

**Figure S1.** (a) A comparison of the percent of site polyclonal migrations for each patient's migration history when using the best migration history chosen by Metient (x-axis) vs. a model that assumes primary-only seeding (y-axis). (b) Percent of patients in each dataset with the root cancerous clone observed in a metastatic site. (c) The distribution of seeding patterns in each dataset when taking the migration history on the approximate Pareto front with the lowest number of seeding sites, run with Metient-calibrate. (d) The distribution of seeding patterns across all patients if we choose the migration history on the Pareto front with the lowest number of seeding sites (primary-only seeding model), lowest number of migrations (migration penalizing model), or the top Metient-calibrate solution. (e) A comparison of the number of metastatic sites that seed other sites between migration histories chosen by a model which chooses the migration history with a model that assumes primary-only seeding vs. Metient. Statistical significance assessed by a paired t-test,  $p=2.233e-06$ .

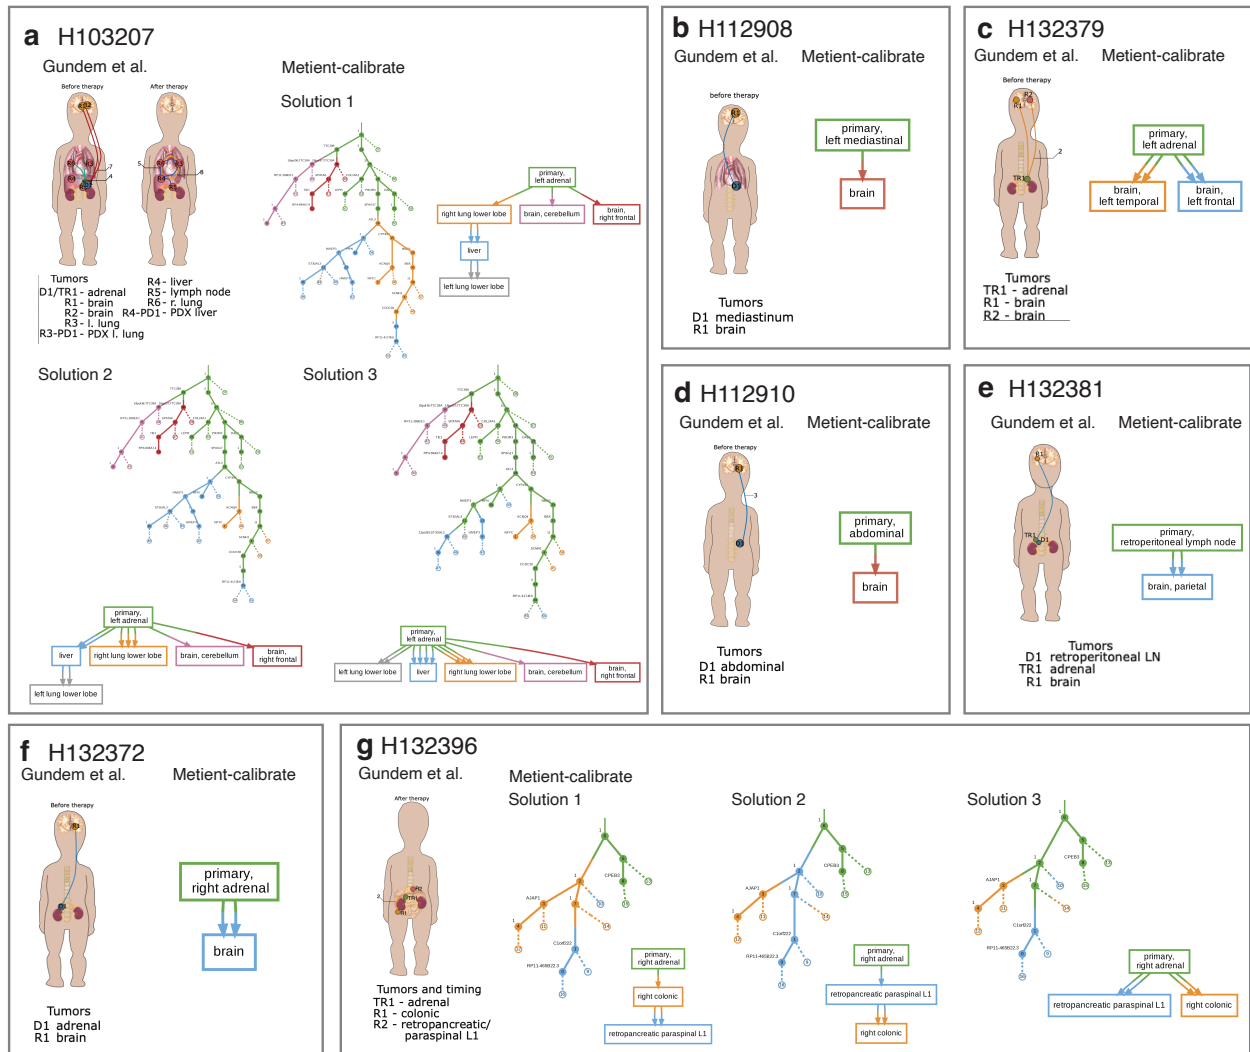

**Figure S2.** Comparison of Gudem et al.<sup>9</sup> reported body maps (left of each square) and Metient-calibrate inferred histories. The Metient-calibrate solutions with unique migration graphs on the Pareto front are shown. For example, in cases where there are multiple Pareto optimal migration histories with the same migration graph, only the migration history with the lowest loss is shown.

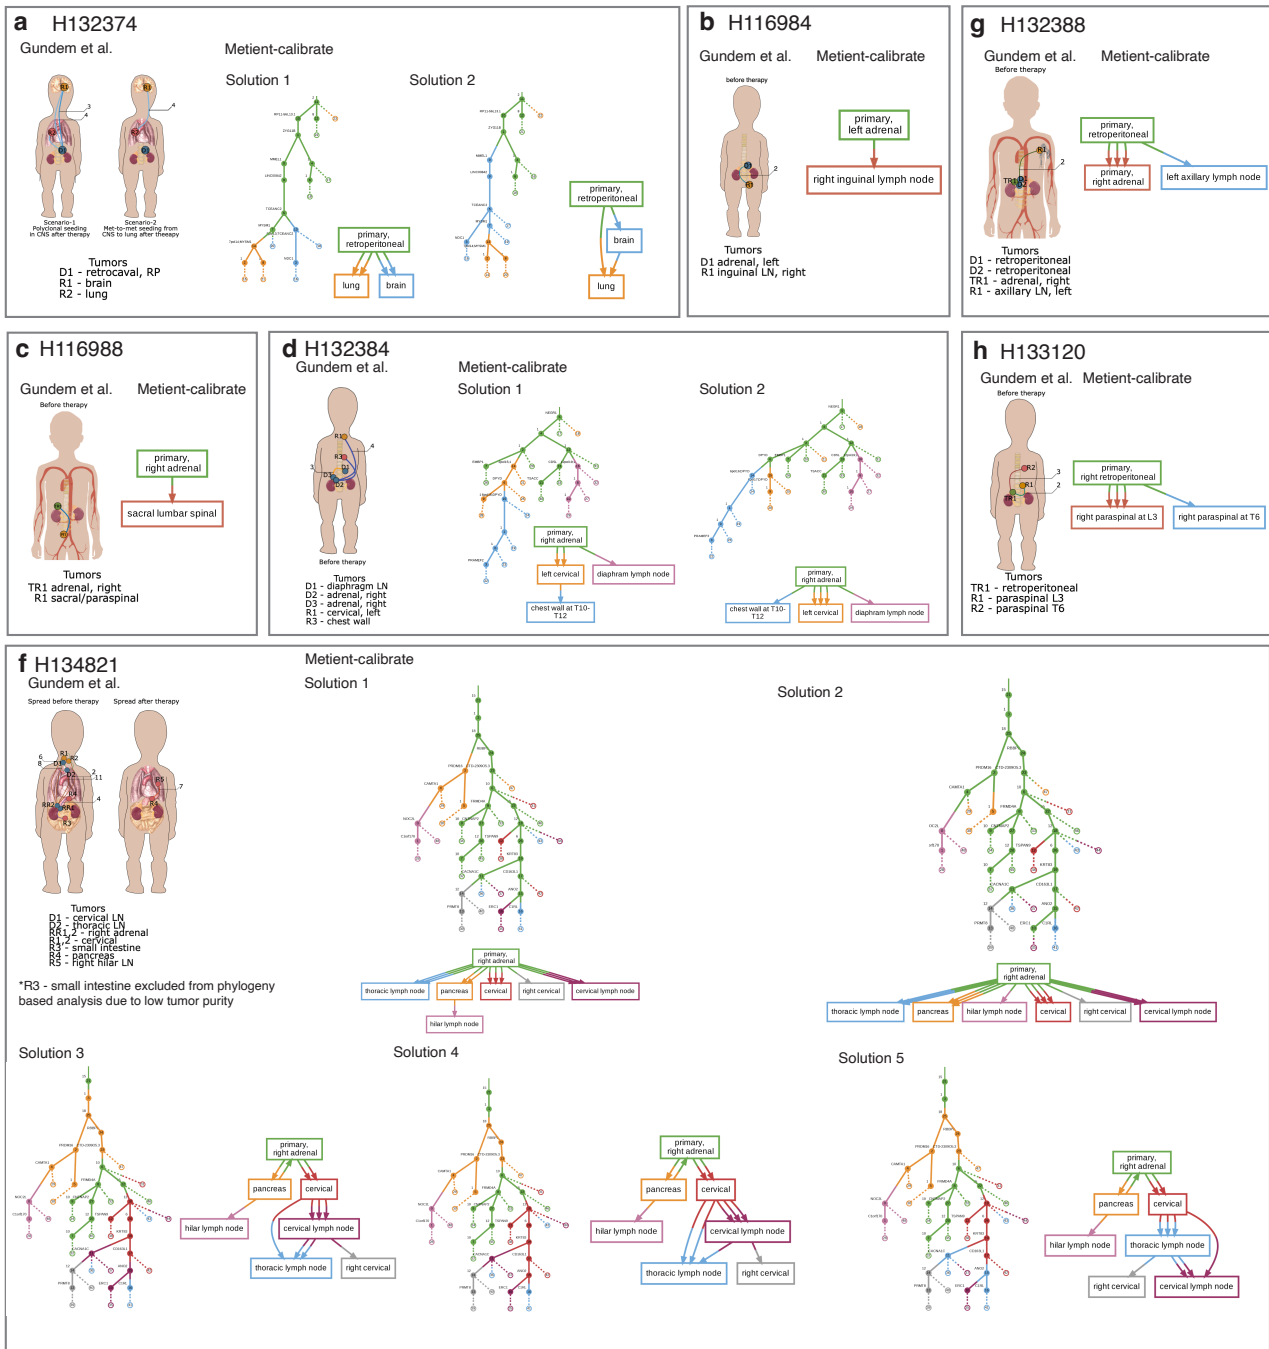

**Figure S3.** Comparison of Gudem et al.<sup>9</sup> reported body maps (left of each square) and Metient-calibrate inferred histories. The Metient-calibrate solutions with unique migration graphs on the Pareto front are shown. For example, in cases where there are multiple Pareto optimal migration histories with the same migration graph, only the migration history with the lowest loss is shown.





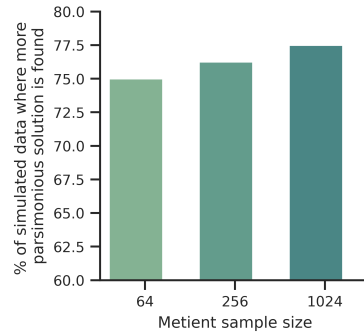

**Figure S6.** The percent of simulated data where a more parsimonious solution than ground truth is found when running Metient-1024 in calibrate mode with polytomy resolution. More parsimonious is defined as at least one of the parsimony metrics (migration, comigration and seeding site number) being less than the ground truth and all other metrics being equal.

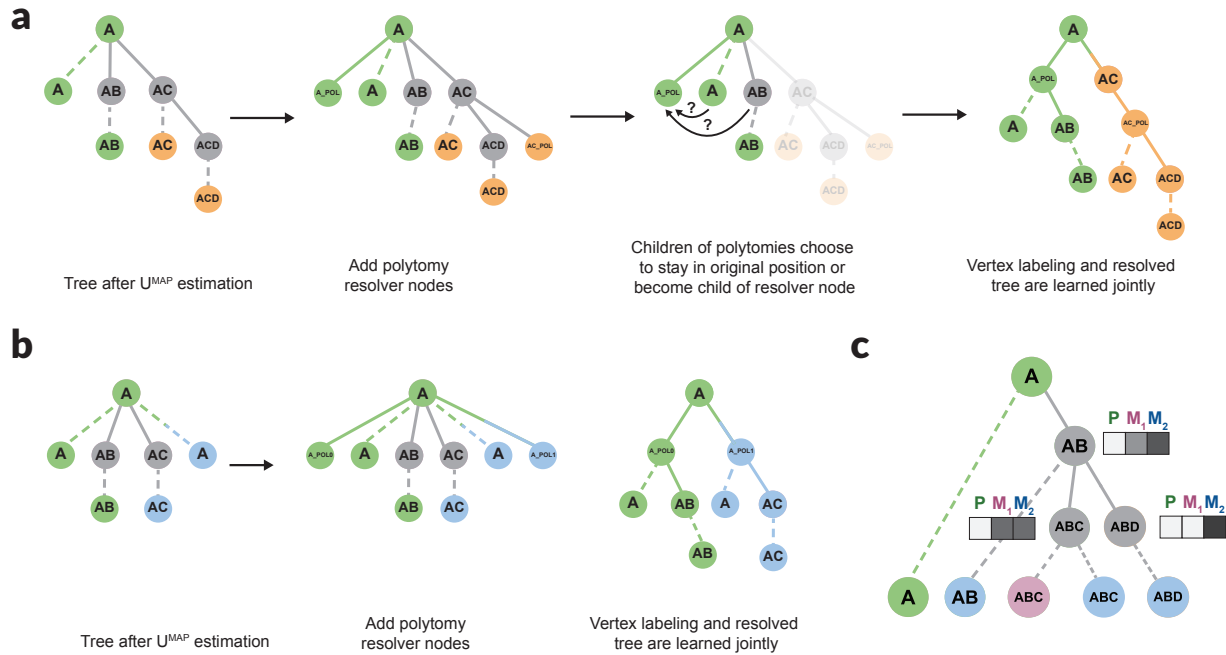

**Figure S7. (a)** Polytoomy resolution algorithm with two nodes (A and AC) that have polytomies that can be resolved. **(b)** Polytoomy resolution algorithm for a single node with four children and thus two resolver nodes. **(c)** Weight initialization is done such that nodes start with higher probabilities of being in the same site as the site that they or their children are detected in (after  $U^{MAP}$  estimation).

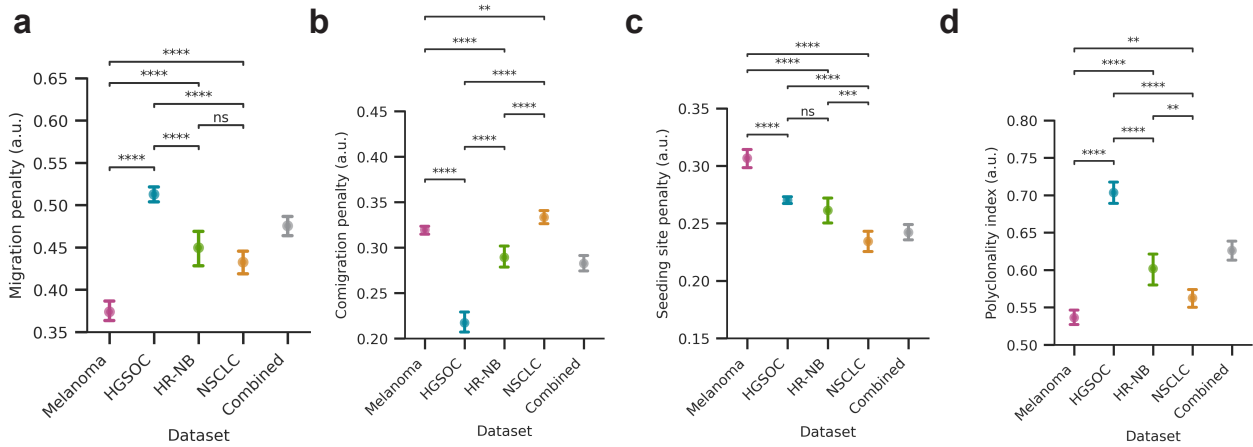

**Figure S8.** The (a) migration penalty/weight, (b) comigration penalty/weight, and (c) seeding site penalty/weight for each cohort, when taking 100 bootstrap samples of each cohort and fitting the weights to the bootstrapped sample. (d) The polyclonality index, which is  $1 - (w_c / (w_m + w_c))$ , where  $w_m$  is the migration penalty/weight and  $w_c$  is the comigration penalty/weight. Statistical significance tested through a Welch's t-test; ns:  $5e-02 < p \leq 1$ , \*:  $1e-02 < p \leq 5e-02$ , \*\*:  $1e-03 < p \leq 1e-02$ , \*\*\*:  $1e-04 < p \leq 1e-03$ , \*\*\*\*:  $p \leq 1e-04$ .

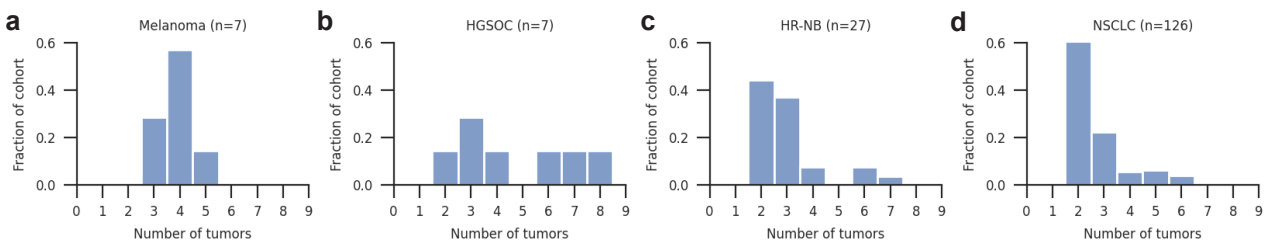

**Figure S9.** The distribution of tumors (number of distinct anatomical sites) for each cohort: (a) melanoma, (b) high-grade serous ovarian cancer (HGSOc), (c) high-risk neuroblastoma (HR-NB) and (d) non-small cell lung cancer (NSCLC).

| Method                   | Previous Methods for Migration History Inference |                                      |                        |                    |                |                  |                     |
|--------------------------|--------------------------------------------------|--------------------------------------|------------------------|--------------------|----------------|------------------|---------------------|
|                          | Labels clone tree                                | Estimates clone proportions in sites | Models Complex Seeding | Multiple solutions | Organo-tropism | Genetic Distance | Polytomy Resolution |
| ClonEvol <sup>15</sup>   | Y                                                | Y                                    | N                      | Y                  | N              | N                | N                   |
| Treomics <sup>16</sup>   | N                                                | Y                                    | N                      | N                  | N              | N                | N                   |
| MACHINA <sup>17</sup>    | Y                                                | Y                                    | Y                      | N                  | N              | N                | Y                   |
| PathFinder <sup>40</sup> | Y                                                | N                                    | N                      | Y                  | N              | Y                | Y                   |
| Metient                  | Y                                                | Y                                    | Y                      | Y                  | Y              | Y                | Y                   |

**Table 1.** Summary of previous methods which perform some aspect of migration history inference. Y = yes, N = no. Labels clone tree refers to whether the method infers the labels of the internal vertices of a clone tree (e.g. labeling clone AB as originating in lymph in Figure 1c, solution A). Estimates clone proportions in sites refers to whether the method infers the leaf nodes (witness nodes) (e.g. identifying that clone ABC is present in both lymph and liver in Figure 1c, solution A). Multiple solutions indicates whether a method outputs multiple possible migration histories.

| Parsimony model                          | Migration number weight ( $w_m$ ) | Comigration number weight ( $w_c$ ) | Seeding number ( $w_s$ ) | site weight |
|------------------------------------------|-----------------------------------|-------------------------------------|--------------------------|-------------|
| $w_m \gg w_c \gg w_s$<br>(MACHINA model) | 1000                              | 100                                 | 1                        |             |
| $w_c \gg w_m \gg w_s$                    | 100                               | 1000                                | 1                        |             |
| $w_s \gg w_m \gg w_c$                    | 100                               | 1                                   | 1000                     |             |
| $w_s \gg w_c \gg w_m$                    | 1                                 | 100                                 | 1000                     |             |
| $w_c \gg w_s \gg w_m$                    | 1                                 | 1000                                | 100                      |             |
| $w_m \gg w_s \gg w_c$                    | 1000                              | 1                                   | 100                      |             |

**Table 2.** The multiple parsimony models that Metient uses to build a Pareto front of solutions for a patient's data. Each parsimony model has a different relative weighting on each parsimony metric.

### Average migration graph F1-scores

| Method                  | Primary-only | Met-to-met   | Macro-F1     | Micro-F1     |
|-------------------------|--------------|--------------|--------------|--------------|
| Evaluate (MP)           | 0.930        | 0.688        | 0.809        | 0.736        |
| Evaluate (MP) + polyres | <b>0.983</b> | 0.648        | 0.816        | 0.715        |
| Evaluate (GD)           | 0.857        | 0.691        | 0.774        | 0.724        |
| Evaluate (GD) + polyres | 0.829        | 0.649        | 0.739        | 0.685        |
| Calibrate               | 0.930        | <b>0.716</b> | <b>0.823</b> | <b>0.759</b> |
| Calibrate + polyres     | <b>0.983</b> | 0.662        | <b>0.823</b> | 0.726        |
| MACHINA                 | 0.968        | 0.643        | 0.806        | 0.708        |

**Table 3.** Average F1-scores of migration graph for each broad seeding pattern (primary-only seeding or metastasis-to-metastasis seeding) on simulated data. All Metient models were run with a sample size of 1024. When multiple solutions are found for a given input, all lowest loss solutions were taken. Evaluate (MP): Metient in evaluate mode with maximum parsimony only. Evaluate (GD): Metient in evaluate mode with genetic distance only. Calibrate: Metient in calibrate mode, using genetic distance as the metastasis prior. polyres: polytomy resolution is used. mS: monoclonal single-source seeding. pS: polyclonal single-source seeding. pM: polyclonal multi-source seeding. pR: polyclonal reseeded.

### Average migrating clone F1-scores

| Method                  | Primary-only | Met-to-met   | Macro-F1     | Micro-F1     |
|-------------------------|--------------|--------------|--------------|--------------|
| Evaluate (MP)           | 0.795        | 0.781        | 0.788        | 0.784        |
| Evaluate (MP) + polyres | 0.873        | 0.791        | 0.832        | 0.808        |
| Evaluate (GD)           | 0.954        | 0.876        | 0.915        | 0.892        |
| Evaluate (GD) + polyres | <b>0.979</b> | <b>0.928</b> | <b>0.954</b> | <b>0.939</b> |
| Calibrate               | 0.961        | 0.916        | 0.938        | 0.925        |
| Calibrate + polyres     | 0.961        | 0.890        | 0.926        | 0.905        |
| MACHINA                 | 0.954        | 0.876        | 0.915        | 0.892        |

**Table 4.** Average F1-scores of migrating clones for each broad seeding pattern (primary-only seeding or metastasis-to-metastasis seeding) on simulated data. All Metient models were run with a sample size of 1024. When multiple solutions are found for a given input, all lowest loss solutions were taken. Evaluate (MP): Metient in evaluate mode with maximum parsimony only. Evaluate (GD): Metient in evaluate mode with genetic distance only. Calibrate: Metient in calibrate mode, using genetic distance as the metastasis prior. polyres: polytomy resolution is used.

## 717 Supplementary Information

### 718 A. Evaluating migration histories

719 We present our technique for optimizing migration histories in the context of variational inference. Our goal is to  
 720 approximate the conditional density of latent variable  $\mathbf{V}$  given observed variables  $\mathbf{U}$  and  $\mathbf{T}$ :  $p(\mathbf{V} | \mathbf{U}, \mathbf{T})$ .  $\mathbf{U}$  has  
 721 been optimized as described in the section “Estimating observed clone proportions” in Methods.  $p(\mathbf{V} | \mathbf{U}, \mathbf{T})$  can be  
 722 written as:

$$p(\mathbf{V} | \mathbf{U}, \mathbf{T}) = \frac{p(\mathbf{U}, \mathbf{T} | \mathbf{V})p(\mathbf{V})}{p(\mathbf{U}, \mathbf{T})} \quad (\text{S1})$$

723 We cannot calculate the denominator, or the evidence, as its derivation is intractable (there are many possible values  
 724 of  $\mathbf{V}$ ):

$$p(\mathbf{U}, \mathbf{T}) = \sum_{\mathbf{V}} p(\mathbf{U}, \mathbf{T}, \mathbf{V}) \quad (\text{S2})$$

725 We approximate the posterior distribution  $p(\mathbf{V} | \mathbf{U}, \mathbf{T})$  with a simpler distribution  $q(\mathbf{V})$ , and we aim to minimize the  
 726 Kullback-Leibler (KL) divergence between  $q(\mathbf{V})$  and the true posterior  $p(\mathbf{V} | \mathbf{U}, \mathbf{T})$ . The Evidence Lower Bound  
 727 (ELBO) is given by:

$$\text{ELBO}(q) = \mathbb{E}_{q(\mathbf{V})}[\log p(\mathbf{U}, \mathbf{T}, \mathbf{V})] + \mathbb{H}(\mathbf{V}) \quad (\text{S3})$$

728 Where the second term is the entropy term.

729 To handle the categorical nature of  $\mathbf{V}$ , we use the Gumbel-Softmax reparameterization trick to optimize  $\mathbf{V}$ . Starting  
 730 with a matrix  $\psi \in \{0, 1\}^{K \times C}$ , of randomly initialized values, where  $K$  is the number of anatomical sites and  $C$  is the  
 731 number of clones, and each column represents the unnormalized log probabilities of clone  $c$  being labeled in site  $k$ :

732 1. At every iteration, for each clone  $c$ , we sample  $g_{1c} \dots g_{kc}$ ,  $k$  i.i.d. samples from Gumbel(0,1) and compute  
 733  $y_{ic} = \psi_{ic} + g_{ic}$ . Where a sample  $g$  from the Gumbel is computed as:

$$g = -\log(-\log(u)) \quad \text{where } u \sim \text{Uniform}(0, 1) \quad (\text{S4})$$

734 2. We then sample from the categorical distribution represented by the column vector  $\psi_{:,c}$  by setting  $i^* =$   
 735  $\text{argmax}_i y_{ic}$  and represent that sample with a one-hot encoding in  $\mathbf{V}$ , i.e.,  $\mathbf{V}_{ic} = 1$  if  $i = i^*$ , 0 otherwise.

736 3. Then we evaluate the  $\text{ELBO}(\nu)$  where

$$\nu_{ic} = \frac{\exp(y_{ic}/\tau)}{\sum_{j=1}^k \exp(y_{jc}/\tau)} \quad \text{for } i = 1, \dots, k,$$

737 using a stochastic approximation based on  $\mathbf{V}$ , and take the gradient of this ELBO in the backward pass, thus  
 738 implementing the straight-through estimator.

739 4. During training, start with a high  $\tau$  to permit exploration, then gradually anneal  $\tau$  to a small but non-zero value  
740 so that the Gumbel-Softmax distribution,  $\nu$  resembles a one-hot vector.

741 At the end of training, as  $\tau$  approaches 0, then the gradient becomes unbiased and  $\nu$  approaches  $\mathbf{V}$ . In order  
742 to capture multiple modes of the posterior distribution, each representing different hypotheses about the migration  
743 history, we optimize multiple  $\mathbf{V}$ s in parallel. To do this, we set up steps 1-3 such that  $x$   $\psi$ s are solved for in parallel<sup>58</sup>  
744 (with a different random initialization for each parallel process), where  $x$  is equal to the sample size and is calculated  
745 according to the size of the inputs ( $\propto K^C$ ).

746 Using the Gumbel-Softmax reparameterization as described above, we approximate the expectation in the ELBO  
747 with a sample of  $\mathbf{V}$ , which we denote  $\tilde{\mathbf{V}}$ :

$$\mathbb{E}_{q(\mathbf{V})}[\log p(\mathbf{U}, \mathbf{T}, \mathbf{V})] \approx \log p(\tilde{\mathbf{V}}, \mathbf{U}, \mathbf{T}) \quad (\text{S5})$$

748

$$\mathbb{H}(\mathbf{V}) \approx - \sum_{j=1}^C \sum_{k=1}^K q(\tilde{\mathbf{V}}_{jk}) \log q(\tilde{\mathbf{V}}_{jk}) \quad (\text{S6})$$

749 In the following sections, we describe how we calculate  $p(\tilde{\mathbf{V}}, \mathbf{U}, \mathbf{T})$ , which is broken down into (1)  $p_m(\tilde{\mathbf{V}}, \mathbf{U}, \mathbf{T})$ , i.e.,  
750 the scoring of  $\tilde{\mathbf{V}}$  using maximum parsimony, (2)  $p_g(\tilde{\mathbf{V}}, \mathbf{U}, \mathbf{T})$ , i.e., the scoring of  $\tilde{\mathbf{V}}$  using genetic distance, and (3)  
751  $p_o(\tilde{\mathbf{V}}, \mathbf{U}, \mathbf{T})$ , i.e., the scoring of  $\tilde{\mathbf{V}}$  using organotropism.

752 **A.1. Evaluating maximum parsimony.** As previously described by MACHINA<sup>17</sup>, the maximum parsimony metrics are  
753 defined as:

- 754 • **migration number**  $m$ : Given clone tree  $\mathbf{T}$  and clone tree labeling  $\mathbf{V}$ , the migration number is the number of  
755 edges in  $\mathbf{T}$  where the outgoing node and incoming node have a different label. It is the number of edges in  
756 migration graph  $\mathbf{G}$ .
  
- 757 • **comigration number**  $c$ : Given clone tree  $\mathbf{T}$  and clone tree labeling  $\mathbf{V}$ , the comigration number is a subset of  
758 the migration edges between two anatomical sites, such that the migration edges occur on distinct branches  
759 of the clone tree. It is the number of multi-edges in migration graph  $\mathbf{G}$  if  $\mathbf{G}$  does not contain cycles.
  
- 760 • **seeding site number**  $s$ : Given a clone tree  $\mathbf{T}$  and clone tree labeling  $\mathbf{V}$ , the seeding site number is the  
761 number of unique anatomical sites with an outgoing edge. It is the number of edges in migration graph  $\mathbf{G}$  with  
762 an outgoing edge.

Maximum parsimony scoring calculates the number of migrations  $m$ , comigrations  $c$ , and seeding sites  $s$ .

$$p_m(\tilde{\mathbf{V}}, \mathbf{U}, \mathbf{T}) = w_m \cdot m + w_c \cdot c + w_s \cdot s \quad (\text{S7})$$

$$m = \sum_{ij} \mathbf{G} - \text{Trace}(\mathbf{G})$$

$$s = \sum_{j=1}^n \left( \left( \sum_{i=1}^m (\mathbf{G} \odot (\mathbf{J}_K - \mathbf{I}_K))_i \right)^* \right)_j$$

$$c = \sum_{ij} \mathbf{G}_{ij}^* - \text{Tr}(\mathbf{G}^*) + \sum_{ij} \left( \sum_{l=1}^m (\mathbf{P} \odot (\mathbf{W} \odot \mathbf{X}))_l \right)_{ij}$$

763 where  $\mathbf{G} = \tilde{\mathbf{V}}\mathbf{T}\tilde{\mathbf{V}}^T$ ,  $\mathbf{P} = (\mathbf{T} \vee \mathbf{I}_N)^{N-1}$ ,  $\mathbf{X} = \tilde{\mathbf{V}}^T\tilde{\mathbf{V}}$ ,  $\mathbf{Y} = \sum_{i=1}^m ((\tilde{\mathbf{V}}\mathbf{T}\tilde{\mathbf{V}}^T \odot (\mathbf{J}_{CK} - \mathbf{V}^T))_i)$ ,  $\mathbf{Z}^* = \text{sign}(\mathbf{Z})$ .  $\vee$   
 764 represents boolean matrix multiplication,  $\mathbf{I}_n$  is a  $n \times n$  identity matrix,  $\odot$  is the Hadamard, i.e., element-wise product,  
 765 and  $\mathbf{J}_{mn}$  is a matrix of ones with dimensions  $m \times n$ .

766 **A.2. Evaluating genetic distance.** Genetic distance is a measure of the number of mutations between clones. Given  
 767 a distance matrix  $\mathbf{D}$  which has normalized genetic distances between every clone:

$$p_g(\tilde{\mathbf{V}}, \mathbf{U}, \mathbf{T}) = \frac{w_g}{m} \sum_{ij} -\log(\mathbf{D}) \odot \mathbf{T} \odot (\mathbf{J}_C - \mathbf{X}) \quad (\text{S8})$$

768 where  $\mathbf{J}_C$  is a square matrix of ones,  $\odot$  is the Hadamard, i.e., element-wise product, and  $\mathbf{X} = \tilde{\mathbf{V}}^T\tilde{\mathbf{V}}$ . The product  
 769  $\mathbf{T} \odot \mathbf{J}_C - \mathbf{X}$  tells us if two nodes have an edge between them and they are in different sites. Taking the hadamard  
 770 product of this with the negative log of  $\mathbf{D}$  gives lower scores to edges with higher genetic distances. We normalize by  
 771 the migration number  $m$  so we don't implicitly penalize migration histories with more migrations through this scoring.

**A.3. Evaluating organotropism.** Organotropism refers to the observation that certain cancers metastasize to specific  
 organs. We penalize migration edges between organs that are less likely to occur based on clinical data. Given a  
 vector  $\mathbf{o}$  which contains the frequency that a primary tumor seeds other anatomical sites:

$$p_o(\tilde{\mathbf{V}}, \mathbf{U}, \mathbf{T}) = \frac{w_o}{m_p} \sum_{i=1}^K -\log(\mathbf{o}) \odot (\mathbf{G} \odot (\mathbf{J}_K - \mathbf{I}_K))_{p,i} \quad (\text{S9})$$

772 where  $\mathbf{G} = \tilde{\mathbf{V}}\mathbf{T}\tilde{\mathbf{V}}^T$ ,  $\odot$  is the Hadamard, i.e., element-wise product,  $\mathbf{J}_K$  is a square matrix of ones, and  $\mathbf{I}_K$  is  
 773 the identity matrix. The product  $(\mathbf{G} \odot (\mathbf{J}_K - \mathbf{I}_K))$  contains the number of migrations between different sites, and  
 774 taking the Hadamard product of this with the negative log of  $\mathbf{o}$  gives lower scores to migration edges with higher  
 775 organotropism frequencies. The subscript  $p, i$  represents taking the row of  $(\mathbf{G} \odot (\mathbf{J}_K - \mathbf{I}_K))$  which represents the  
 776 primary site index and summing over the columns at every other anatomical site  $i$ . We normalize by  $m_p$ , the number  
 777 of migrations originating from the primary site, so we don't implicitly penalize migration histories with more migrations  
 778 through this scoring.

## 779 B. Calibrate alignment

780 A parsimony model is represented by a set of parsimony weights –  $w_m$ ,  $w_c$ , and  $w_s$  – assigned, respectively, to the  
 781 number of migrations (indicated by  $m$ ), comigrations ( $c$ ), seeding sites ( $s$ ). A migration history's parsimony score,  $p$ ,  
 782 is the model-weighted average of these three parsimony metrics, i.e.,  $p = w_m m + w_c c + w_s s$  (Equation S7). Different  
 783 parsimony models favor different histories on the Pareto front. To fit a parsimony model to a cancer type-specific  
 784 cohort, we look at how well the maximum parsimony distribution aligns with the genetic distance distribution of each  
 785 patient's migration history trees.

786 Take a cohort of  $N$  patients, where each patient,  $n$ , is associated with a set,

$$S^{(n)} = \left\{ t_i^{(n)} \right\}_{i=1}^{T^{(n)}},$$

787 of  $T^{(n)}$  migration histories. Each migration history  $t$  is associated with a genetic distance  $g_t$  (or, alternatively, an  
 788 organotropism score), and a vector of parsimony metrics  $\mathbf{x}_t = [m_t \ c_t \ s_t]$  (i.e., the counts of migrations, comigrations,  
 789 and seeding sites, respectively). The goal is to set the parameters,  $\theta = [w_m \ w_c \ w_s]$  of the parsimony prior  $q(t) \propto$   
 790  $\exp(-\mathbf{x}_t^T \theta)$  so that it matches, as best as possible, a target distribution,  $p(t)$ , over the migration histories  $t$  implied  
 791 by the  $g_t$ , where  $p(t) \propto \exp(-\tau g_t)$  and  $\tau$  is a user-defined "temperature" hyper-parameter.

792 To fit these parameters, we define patient-specific categorical distributions  $p^{(n)}(t)$  and  $q^{(n)}(t)$  as follows. Let  $\mathbf{g}^{(n)}$   
 793 be the vector of length  $T^{(n)}$  of genetic distances of the migration histories for patient  $n$ , where  $g_i^{(n)}$  is the genetic  
 794 distance for the  $i$ -th tree. And let the column vector  $\mathbf{x}_i^{(n)}$  be the parsimony metrics for the  $i$ -th migration history  
 795 associated with patient  $n$ . We will append the  $T^{(n)}$  vectors  $\mathbf{x}_i^{(n)}$  to make a  $3 \times T^{(n)}$  design matrix  $X^{(n)}$ . Also we  
 796 define the vector-valued softmax function in the typical way, i.e.,

$$\text{softmax}(\mathbf{v})_i = \frac{\exp(v_i)}{\sum_{j=1}^{|\mathbf{v}|} \exp(v_j)}$$

797 where  $\text{softmax}(\mathbf{v})_i$  is the  $i$ -th element of the vector output by  $\text{softmax}(\mathbf{v})$ . Then the "parsimony" probability  
 798 distribution over the trees for patient  $n$  is represented by the vector  $\mathbf{q}^{(n)}$

$$\mathbf{q}^{(n)} = \text{softmax}(-\theta^T X^{(n)})$$

799 and the target distribution by the vector  $\mathbf{p}^{(n)}$

$$\mathbf{p}^{(n)} = \text{softmax}(-\tau \mathbf{g}^{(n)}).$$



800 Then we define the cohort calibration objective  $E(\theta)$  as an average cross-entropy over the patient cohort, i.e.,

$$E(\theta) = \sum_{n=1}^N w_n \left( \sum_{i=1}^{T^{(n)}} p_i^{(n)} \log q_i^{(n)} \right)$$

801 and the MLE estimate of the parameters is  $\theta^* = \operatorname{argmax}_{\theta} E(\theta)$ .  $w_n$  is set to  $\log(E/(r \cdot b))$ , where  $E$  is the number of  
 802 internal edges of a patient's clone tree,  $r$  is the number of possible primaries for the patient, and  $b$  is the number of  
 803 possible clone trees for a given patient (so as not to bias towards patients with multiple possible primaries or multiple  
 804 possible clone trees). Since the number of edges is equal to the maximum number of migrations possible in a tree,  
 805 it is also equal to the number of possible genetic distance observations that that tree can provide in the genetic  
 806 distance scoring of that tree. Therefore,  $w_n$  is representative of the information content that a patient can provide  
 807 when fitting  $\theta$ .

808 **B.1. Specifying the target distribution by setting the temperature parameter.** The use of  $E(\theta)$  to set  $\theta$  requires that for  
 809 a patient  $n$  that, generally speaking, the genetic distance  $g_i^{(n)}$  for a potential migration history, represented by a tree  
 810  $i$ , is lower for more probable histories. However, because  $E(\theta)$  is minimized when  $\tau \mathbf{g}^{(n)} = \theta X^{(n)} + c \mathbf{1}$  for some  
 811 constant  $c$ , this could be a very strong assumption, one that we might not always be comfortable making.  
 812 Fortunately, we can set  $\tau$  to increase the correctness of this assumption. Notice that in the limit of large  $\tau$  that

$$\lim_{\tau \rightarrow \infty} E(\theta) = \sum_{n=1}^N w_n \log q_{i_n^*}^{(n)}$$

813 where  $i_n^* = \operatorname{argmin}_i g_i^{(n)}$ , assuming that the minimum is unique. If the minimum is not unique then the above is true  
 814 if we replace  $\log q_{i_n^*}^{(n)}$  with the average of  $\log q_t^{(n)}$  of all the trees  $t$  that have the minimum genetic distance for patient  
 815  $n$ .

816 So, in other words, if we set  $\tau$  to be very large, then  $E(\theta)$  is just the (weighted) sum of the log probabilities of  
 817 the minimum genetic distance trees in each patient, and optimizing  $E(\theta)$  corresponds to maximizing the parsimony  
 818 probabilities of the best scoring trees per patient under the genetic distance score.

$$\prod_i \frac{\exp(X^{(i)\tau} \theta)}{\sum_{j | \operatorname{rank}(j) \geq \operatorname{rank}(i)} \exp(X^{(j)\tau} \theta)}$$

819 So, we set  $\tau$  to be large, such that  $\tau$  is multiple times the maximum genetic distance (assuming that the genetic  
 820 distance is always positive). We do the same for the organotropism prior.

## 821 C. Case-by-case differences to expert annotations

822 **C.1. Comparisons to Melanoma patients from Sanborn et al.** Migration histories generated for the metastatic  
 823 melanoma cohort using Metient-calibrate agree with the expert analysis that most melanoma patients exhibit primary  
 824 single-source seeding (7/7 patients; Supplementary Figure S4). For patient F (Supplementary Figure S4c), our

825 reconstruction of the clone tree and observed clones does not suggest that a lymph node to distant metastasis  
826 seeding event is likely, but that this patient also likely exhibits a primary-only seeding pattern. In the second best  
827 solution predicted for patient D, Metient predicts that a locoregional skin metastasis from the right ankle could have  
828 given rise to subsequent metastases, supporting one of the possible paths (in dotted lines) that the original authors  
829 propose (Supplementary Figure S4d). We also predict a primary single-source solution on the Pareto front which is  
830 another possible path proposed by the authors (Supplementary Figure S4d).

831 **C.2. Comparisons to HGSOc patients from McPherson et al.** In the seven HGSOc patients, predicted migration  
832 histories by McPherson et al.<sup>4</sup> were made available using an algorithm that only minimizes migrations (Sankoff  
833 algorithm<sup>60</sup>). We find that four out of seven patients are in complete agreement (Supplemental Figure S5). For  
834 patient 1, by resolving polytomies, we offer an explanation with less migrations and comigrations, and predict that  
835 the left fallopian tube rather than the small bowel served as a possible intermediate site before further metastatic  
836 dissemination (Supplemental Figure S5a). For patient 3, we offer an explanation with less migrations, comigrations  
837 and seeding sites, suggesting that all metastases were seeded from the primary (Supplemental Figure S5c). Finally  
838 for patient 7, solving for polytomies allows us to reduce the migration number by 1 from the right uterosacral to left  
839 ovary, although the overall seeding pattern is in agreement (Supplemental Figure S5d).

840 **C.3. Comparisons to HR-NB patients from Gundem et al.** Because the HR-NB annotations only indicate the presence  
841 of a migration between two sites and not the directionality, we compared our site-to-site migrations (i.e., a binarized  
842 representation of migration graph  $G$  (Figure 1c)) to those that were previously reported. We looked at the 14 HR-NB  
843 patients for which there were manual expert annotations from Gundem et al.<sup>9</sup>, and found that we predict the same  
844 overall site-to-site migrations for 10 out of 14 cases. For patient H103207, we predict their before therapy pattern  
845 on the Pareto front (Solution 3 in Figure S2a), but we prioritize two solutions with metastasis-to-metastasis seeding  
846 between the lung and the liver. A subset of this seeding between the liver and two lobes of the lung is suggested in  
847 their after therapy hypothesis of spread (Figure S2a). While Gundem et al. suggest seeding between the two lobes  
848 of the lung as well as from each lobe of the lung to the liver, we infer a simpler, serial progression, where the right  
849 lung lower lobe seeds the liver, which subsequently seed the left lung lower lobe (Solution 1 in Figure S2a). For  
850 patient H132396, Metient prioritizes migration histories with fewer migrations (Solutions 1 and 2 in Figure S2g), but  
851 presents the expert annotation on the Pareto front (Solution 3 in Figure S2g). For patient H132384, Metient proposes  
852 bone-to-bone secondary metastasis formation (Solution 1 in Figure S3d), but again presents the expert annotation  
853 on the Pareto front (Solution 2 in Figure S3d). For patient H134821, we infer the same pancreas to hilar lymph node  
854 seeding proposed by the authors as spread after therapy, but suggest that all other metastases were seeded directly  
855 by the primary (Solution 1 in Figure S3f). However, we report the same metastasis-to-metastasis seeding between  
856 the cervical and thoracic lymph nodes and cervical metastases as the authors in alternative solutions on the Pareto  
857 front (Solutions 3-5 in Figure S3f).

## 858 **D. Model choice impacts downstream analyses**

859 As we were analyzing different aspects of metastatic dissemination, we asked how these answers might change if a  
860 seeding model is enforced when reconstructing a patient's migration history. To highlight how the choice of seeding  
861 model can impact the analysis and interpretation of metastatic dissemination, we compared the migration histories  
862 produced by three models: (1) assumption of primary, single-source seeding, (2) the MACHINA assumptions, which  
863 first minimize migrations, and then break ties based on comigration number followed by seeding site number, and  
864 finally (3) the adaptive Metient model fit to each cohort. As expected, a primary, single-source seeding model  
865 chooses a primary, single-source dissemination pattern for 100% of patients (Supplementary Figure S1c). The  
866 migration penalizing model chooses a primary single-source seeding explanation in 82.6% of patients, and Metient  
867 falls in between the two, choosing a primary single-source seeding explanation in 86.2% of patients (Supplementary  
868 Figure S1d). Importantly, since Metient can recover and evaluate the relative trade-offs of the parsimony metrics,  
869 when choosing a primary single-source solution, our model has either not found a plausible metastasis-to-metastasis  
870 explanation for a patient's data on the Pareto front, or has used the metastasis priors to deem such an explanation  
871 less likely. In contrast, previous models do not automatically recover multiple possible hypotheses, therefore reducing  
872 confidence in these algorithms' choice of best history.

873 In addition to having an impact on the inferred seeding patterns, a model that assumes primary single-source seeding  
874 also changes other interpretations of metastatic seeding. We asked two questions about the best migration histories  
875 produced by the two extremes of models, i.e. the assumption of primary, single-source seeding and Metient: (1)  
876 the frequency in which a new seeding site is added, and (2) the frequency of polyclonal migrations between two  
877 sites. As expected, a model which assumes primary, single-source seeding promotes migration histories with only  
878 one seeding site (Supplementary Figure S1e). In turn, such a model infers a higher fraction of polyclonal migrations  
879 (Supplementary Figure S1a) compared to the histories prioritized by Metient. The trade-off between polyclonality  
880 and seeding sites occurs because additional seeding sites reduce the number of migration edges that must be  
881 placed between the primary and all other metastases. Balancing this trade-off correctly is important as it impacts  
882 the interpretation of seeding clonality as well as which clones perform seeding. Specifically, 9% (15/167) of patients  
883 have differing colonizing clones between the two models, changing the inference of which clones, and therefore  
884 which mutations, have metastatic competence.

## 885 **E. Bulk DNA sequencing pre-processing**

886 **E.1. Variant read probability calculation ( $\omega$ ).** In order to account for non-diploid copy number and tumor purities, we  
887 require a variant read probability  $\omega$  to be input for every genomic locus in each sample. For a given sample  $s$  and  
888 variant allele  $j$ , the variant read probability  $\omega_{js}$  is the probability of observing a read with the variant allele at that  
889 locus in a cell with the mutation, and is calculated as:

$$\omega_{js} = M_{js}/N_{js} \quad (\text{S10})$$

890 where  $M_{js}$  is the number of copies of the mutant allele  $j$  in sample  $s$  in the cells that contain the mutant allele, and  
891  $N_{js}$  is the average number of copies at the genomic locus of the mutation  $j$  in all cells in  $s$ .

To account for the fact that cancer cells frequently have different numbers of copies at genomic loci compared to normal cells,  $N_{js}$  is calculated as:

$$N_{js} = \rho_s N_{js}^{(c)} + (1 - \rho_s) N_{js}^{(h)} \quad (\text{S11})$$

892 where:

- 893 •  $N_{js}^{(c)}$  is the population average copy number of the locus which contains mutant allele  $j$  in the cancer cell  
894 population
- 895 •  $N_{js}^{(h)}$  is the copy number at the genomic locus of mutation  $j$  in the normal cell population. In diploid cells this  
896 is 2, and in haploid cells this is 1.
- 897 •  $\rho_s$  is the tumor purity of sample  $s$

898  $\rho_s$  and  $N_{js}^{(c)}$  (and sometimes  $N_{js}$ ) are normal outputs from a copy number calling pipeline. We suggest setting  
899  $M_{js} = 1$  unless there is strong evidence that the  $j$  allele has been amplified. In this case, allele-specific copy number  
900 callers provide the major allele copy number  $A_{js}$  and minor allele copy number  $B_{js}$ , where  $N_{js}^{(c)} = A_{js} + B_{js}$ , and  
901  $M_{js} = A_{js}$ . When a locus is impacted by many different CNAs, accurately estimating  $M_{js}$  is challenging since  
902 there are likely subclonal changes in the multiplicity of the  $j$  allele, in which case we recommend excluding these  
903 mutations. For additional information on how to estimate  $M_{js}$  and  $N_{js}$  please refer to Tarabichi et al. <sup>61</sup>.

904 If clustering is used, we have to properly combine multiple SNV loci with different potential variant read probabilities.  
905 To do this, we rescale the reference and variant allele read counts for each locus and then set its variant read  
906 probability to 0.5 before combining variants within a cluster (where we add the reference and variant allele read  
907 counts for all variants within a cluster). This rescaling allows us to effectively treat the variant as coming from a  
908 diploid locus. To achieve this, we use the following rescaling formulas, which has been previously described in  
909 Wintersinger et al. <sup>53</sup>:

$$\begin{aligned}T_{js} &= V_{js} + R_{js} \\ \hat{T}_{js} &= 2\omega_{js}T_{js} \\ \hat{V}_{js} &= \min(V_{js}, \hat{T}_{js}) \\ \hat{R}_{js} &= \hat{T}_{js} - \hat{V}_{js} \\ \hat{\omega}_{js} &= \frac{1}{2}\end{aligned}$$

910 Where  $T_{js}$  is the input count of total reads,  $V_{js}$  is the input count of variant reads,  $R_{js}$  is the input count of reference  
911 reads, and  $\omega_{js}$  is the variant read probability at a genomic locus  $j$  in anatomical site  $s$ . The rescaled total, reference,  
912 and variant allele read counts and variant read probability are  $\hat{T}_{js}$ ,  $\hat{V}_{js}$ ,  $\hat{R}_{js}$  and  $\hat{\omega}_{js}$ , respectively.

913 **E.2. Breast Cancer Dataset.** The single nucleotide variant calls from two breast cancer patients with whole genome  
914 sequencing data were taken from Hoadley et al.<sup>20</sup>. The variant calls were in copy number neutral variant positions  
915 and tumor purity was not reported, so reference and variant counts along with defaults for tumor purity, major  
916 copy number and minor copy number (defaults are 1.0, 1, 1, respectively) were inputted into PyClone-0.13.1 clonal  
917 analysis<sup>62</sup>. PyClone's MCMC chain was run for 100,000 iterations, discarding the first 50,000 as burnin. Orchard  
918 was run using the PyClone clusters as input with -p flag to force trees to be monoprimary (come from a singular  
919 root cancer clone) and all variant read probabilities set to the default of 0.5, since SNVs from regions with CNAs  
920 were excluded, and tumor purity was not reported and thus assumed to be 1. We ran Metient-evaluate on this data  
921 using all default configurations (dynamically calculated sample size based on size of input clone tree and number of  
922 anatomical sites).

923 **E.3. High-grade Serous Ovarian Cancer Dataset.** To better compare to McPherson et al.'s own migration history  
924 analysis, we used the mutation clusters, clone trees and cellular prevalences of each clone that they estimate and  
925 report<sup>4</sup>. Metient was run with the  $\mathbf{U}$  matrix inputted, and we solve for  $\mathbf{V}$  for each patient. We ran Metient-calibrate  
926 on this data using all default configurations (dynamically calculated sample size based on size of input clone tree  
927 and number of anatomical sites) and with polytomy resolution.

928 **E.4. Melanoma Dataset.** The single nucleotide variant and copy number calls from eight melanoma patients with  
929 whole exome sequencing data were taken from Sanborn et al.<sup>3</sup>, along with estimated tumor purity. Only SNVs in  
930 copy number neutral regions were considered. Patient H was excluded due to a lack of copy number neutral SNVs.  
931 Reference and variant read counts along with major and minor copy number and tumor purity were inputted into  
932 PyClone-VI 0.1.3 for clonal analysis<sup>63</sup>. PyClone-VI's fit command was run with all default parameters. Orchard  
933 was run using the PyClone clusters as input with -p flag to force trees to be monoprimary (come from a singular  
934 root cancer clone). Variant read probabilities for Orchard were calculated using major copy number, minor copy  
935 number and tumor purity according to Equation S10. We ran Metient-calibrate with the clonal proportions estimated

936 by running Orchard (i.e.,  $\eta$  in Orchard's output) using all default configurations and with polytomy resolution.

937 **E.5. Neuroblastoma Dataset.** Access to multi-WGS data for 45 neuroblastoma patients was provided through dbGaP  
938 accession phs031111<sup>9</sup>. Of these 45 patients, 27 patients had at least one primary and one metastatic tumor sample  
939 with a tumor purity of >10%, and all analysis was conducted on this patient subset. Single nucleotide variant, copy  
940 number calls and tumor purities were collected from this dataset, and clusters produced from the original paper using  
941 DPCLust<sup>64</sup> were used. Multiple samples for the same anatomical site and sample time (i.e., diagnosis, therapy-naive  
942 re-resection, therapy resection during induction chemotherapy, relapse or further relapse) were combined by pooling  
943 reference and variant allele counts. Orchard was run using the DPCLust clusters as input with -p flag to force trees  
944 to be monoprimarily (come from a singular root cancer clone). Variant read probabilities for Orchard and Metient  
945 were calculated using major copy number, minor copy number and tumor purity according to Equation S10. We  
946 ran Metient-calibrate with the clonal proportions estimated by running Orchard (i.e.,  $\eta$  in Orchard's output) using all  
947 default configurations and with polytomy resolution.

948 For three patients (H103207, H132388, H134822), multiple primary tumor samples were collected at different time  
949 points (diagnosis and resection during therapy). For these patients, we treated the therapy resection and diagnosis  
950 tumor as multiple samples from the same anatomical site if the anatomical site was labeled the same, and as two  
951 different primaries if the anatomical sites were different. The therapy resections were usually taken a few months  
952 after diagnosis tumor samples.

953 **E.6. Non-small Cell Lung Cancer Dataset.** We used the clustered SNVs, clone trees and observed clone proportions  
954 made available by the TRACERx consortium for 126 non-small cell lung cancer (NSCLC) patients (downloaded from  
955 <https://zenodo.org/record/7649257>). When samples for multiple regions of a tumor were available, the reference  
956 and variant allele counts were summed together to generate reference and variant allele counts for the entire tumor.  
957 Since we model variant allele counts as binomially distributed with  $n$  total reads (variant + reference) and  $p$  probability  
958 of generating a variant read, this summing assumes that each sampled region of a tumor has the same probability  
959  $p$ . Metient was run with the  $\mathbf{U}$  matrix inputted, and we solve for  $\mathbf{V}$  for each patient. We ran Metient-calibrate on  
960 this data using all default configurations (dynamically calculated sample size based on size of input clone tree and  
961 number of anatomical sites) and with polytomy resolution.
